1 **Structure-based drug design and characterization of sulfonyl-**  
2 **piperazine benzothiazinone inhibitors of DprE1 from**  
3 ***Mycobacterium tuberculosis***

4  
5 **Jérémie Piton<sup>1</sup>, Anthony Vocat<sup>1</sup>, Andréanne Lupien<sup>1</sup>, Caroline Foo<sup>1</sup>, Olga Riabova<sup>2</sup>, Vadim**  
6 **Makarov<sup>2</sup>, Stewart T. Cole<sup>1\*</sup>**

7  
8 <sup>1</sup>Global Health Institute, Ecole Polytechnique Fédérale de Lausanne, Station 19, 1015 Lausanne,  
9 Switzerland

10 <sup>2</sup>FRC Fundamentals of Biotechnology RAS, Leninsky prospekt 33-2, Moscow, 119071, Russian  
11 Federation

12

13

14

15

16

17

18

19

20

21  
22 \*Corresponding author: S.T. Cole (stewart.cole@epfl.ch) + 41 21 693 1851

23

1 **ABSTRACT**

2 **Macozinone (MCZ) is a tuberculosis (TB) drug candidate that specifically targets the**  
3 **essential flavoenzyme DprE1 thereby blocking synthesis of the cell wall precursor**  
4 **decaprenyl phosphoarabinose (DPA) and provoking lysis of *Mycobacterium tuberculosis*.**  
5 **As part of the MCZ back-up program we exploited structure-guided drug design to**  
6 **produce a new series of sulfone-containing derivatives, 2-sulphonylpiperazin 8-nitro 6-**  
7 **trifluoromethyl 1,3-benzothiazin-4-one, or sPBTZ. These compounds are less active than**  
8 **MCZ but have a better solubility profile and some derivatives display enhanced stability in**  
9 **microsomal assays. DprE1 was efficiently inhibited by sPBTZ and covalent adducts with**  
10 **the active site cysteine residue (C387) were formed. However, despite the H-bonding**  
11 **potential of the sulfone group no additional bonds were seen in the crystal structure of the**  
12 **sPBTZ-DprE1 complex with compound 11326127 as compared to MCZ. Compound**  
13 **11626091, the most advanced sPBTZ, displayed good antitubercular activity in the murine**  
14 **model of chronic TB but was less effective than MCZ. Nonetheless, further testing of this**  
15 **MCZ backup compound is warranted as part of combination treatment with other TB**  
16 **drugs.**  
17

## 1 INTRODUCTION

2 DprE1 is an essential flavoprotein of *Mycobacterium tuberculosis* involved in  
3 decaprenylphosphoryl-beta-D-arabinose (DPA) synthesis. DPA is the sole precursor of arabinose  
4 for production of both arabinogalactan and lipoarabinomannan (1), important components of the  
5 mycobacterial cell wall. DprE1, together with its counterpart DprE2, catalyse the epimerization  
6 of decaprenylphosphoryl-β-D-ribose (DPR) to DPA in a two-step mechanism. In the last decade,  
7 many inhibitors were discovered to target DprE1, which is considered nowadays as the Achilles'  
8 heel of *M. tuberculosis* due to its essentiality and especially to its localization in the periplasm  
9 (2). DprE1 inhibitors can be classified into two families according to their mode of action: some  
10 of them inhibit DprE1 irreversibly by forming a covalent adduct with cysteine 387 (C387) of  
11 DprE1, whereas others act as competitive non-covalent inhibitors (3).

12 The first covalent DprE1 inhibitors discovered were benzothiazinones (BTZ), exemplified  
13 by the lead compound, BTZ043, which is exceptionally potent with *in vitro* and *ex vivo* minimal  
14 inhibitory concentration (MIC) values in the nanomolar range (4). A lead optimization campaign  
15 gave rise to PBTZ169, now known as Macozinone (MCZ). It is currently the most potent BTZ  
16 compound against *M. tuberculosis* with an MIC of 0.3 nM (5), has completed preclinical  
17 development successfully and is now undergoing Phase I and phase II clinical trials  
18 (<https://www.newtdrugs.org/pipeline/clinical>). A common characteristic of the covalent DprE1  
19 inhibitors is the presence of a nitro group on the molecule, which is essential for the mechanism  
20 of inhibition. Indeed, this nitro group is converted by DprE1 containing FADH<sub>2</sub> into an extremely  
21 reactive nitroso group which specifically targets the cysteine residue at position 387 (C387) in the  
22 active site of DprE1, to form a covalent adduct and thereby irreversibly inhibits the enzyme (4-7,

1 8 , 9-13)}. It has been demonstrated that the presence of C387 is essential for the activity of  
2 covalent DprE1 inhibitors (4, 14).

3 Apart from the covalent bond with C387, covalent DprE1 inhibitors are otherwise only  
4 maintained in the pocket by steric hindrance and Van Der Waals interactions, which explains why  
5 a simple substitution at C387 results in complete resistance of the enzyme to these compounds  
6 (3). As part of the MCZ-back-up program, this observation prompted us to revisit the Structure  
7 Activity Relationship (SAR) in order to obtain derivatives with other anchor points in the active  
8 site of DprE1, since such compounds might retain activity against C387 mutants should these  
9 arise.

10 Several non-covalent DprE1 inhibitors have also been found (15-24). Similar to the  
11 covalent DprE1 inhibitors, these non-covalent compounds sit in the substrate-binding pocket of  
12 DprE1 and act as competitive inhibitors. Interestingly, a class of non-covalent inhibitors, 2-  
13 carboxyquinoxalines, are active against BTZ-resistant *M. tuberculosis* strains with substitutions  
14 at C387 of DprE1 (14). Molecules from this family possess an essential 2-carboxylate moiety that  
15 forms key hydrogen bonds with the side-chain of Lysine 418 and the hydroxyl group of Tyrosine  
16 60 (18). Hence, it can be hypothesised that a composite molecule between 2-carboxyquinoxalines  
17 and MCZ could overcome resistance issues and increase specificity to the target.

18 Revisiting the SAR of MCZ further provides the opportunity to improve  
19 pharmacodynamics properties of MCZ such as aqueous solubility to increase its oral  
20 bioavailability, metabolic stability, and *in vivo* activity (25). It has been observed that the potency  
21 of BTZ derivatives is inversely proportional to their solubility (4, 5). Therefore, the solubility and  
22 bioavailability of the most active benzothiazinones are parameters for improvement. Factors  
23 controlling the aqueous solubility of organic molecules are complex and drug solubility issues are

1 usually solved by a combination of empirical and rational drug design strategies. More than  
2 twenty crystal structures of DprE1 with or without inhibitors were reviewed recently to identify  
3 the structural determinants for activity and to guide rational drug design (3).

4 Based on our prior observations, the aim of this study was to design a new structure-  
5 guided series of MCZ derivatives with increased activity against either wild-type *M. tuberculosis*  
6 or its BTZ-resistant mutants, and with improved solubility, absorption, bioavailability and  
7 metabolic stability of the compound *in vivo*. Therefore, a new series of MCZ derivatives,  
8 harbouring a sulfonylpiperazine group, was designed (2-sulphonylpiperazin 8-nitro 6-  
9 trifluoromethyl 1,3-benzothiazin-4-one or sPBTZ), synthesized and characterized. This study  
10 identifies 11626091 as the best sPBTZ and demonstrates that this compound has a promising  
11 combination of antitubercular activity and ADME/T properties.

12

## 13 RESULTS

14 **Rationale.** When BTZ inhibitors bind to their target, DprE1, the sole bond formed is a  
15 covalent semimercaptal bond with the active site cysteine residue, C387. We reasoned first that  
16 introducing a sulfonyl group into the MCZ scaffold might offer a second anchor by mimicking  
17 the carboxylate moiety of the 2-carboxyquinoxalines that acts as a H-bond acceptor with DprE1  
18 and increases affinity of the inhibitor for the target. Secondly, sulfonyl groups are well  
19 characterized and present in many FDA-approved drugs, in particular anti-mycobacterial agents,  
20 such as dapson. Based on these observations, sulfonyl groups might increase both the solubility  
21 and bioavailability of the inhibitor *in vivo*. Lastly, the geometry imposed by sulfonyl groups  
22 opens new directions for investigation of the SAR.

1           **Synthesis of sPBTZ.** The synthesis of 17 sulfanyl-piperazino BTZ (sPBTZ) derivatives  
2 was performed in a two-step procedure from 2-(methylthio)-8-nitro-6-(trifluoromethyl)-4*H*-1,3-  
3 benzothiazin-4-one, as described previously (Makarov et al., 2014). Its reaction with a 5-molar  
4 excess of free piperazine generated the corresponding piperazine derivative with a high yield.  
5 This scaffold was used in the reactions with different alkyl-, aryl- or heteryl-sulfochlorides to  
6 form sulfanyl-piperazino BTZs. The compounds synthesized have different types of sulfonyl  
7 substitutions thus allowing the structure-activity relationship to be studied. It is clear that  
8 compounds with alkyl substitutions have much better antitubercular activity and aryl derivatives  
9 have much lower activity, consistent with our previous data for piperazine-containing BTZ  
10 (PBTZ) derivatives (Makarov et al., 2014).

11           **Solubility.** The octanol-water partition coefficient, logP, which is regarded as a suitable  
12 indicator of molecular hydrophobicity and bioavailability, was calculated for all derivatives to  
13 measure the effects of introducing a sulfonyl group on the PBTZ backbone. Interestingly, the  
14 addition of the sulfonyl group between the benzothiazinone and piperazine moieties has the  
15 tendency to decrease the clogP coefficient and therefore hydrophobicity (Table 1). The  
16 sulfonylated derivative of MCZ, sPBTZ169 (11326127) that carries a sulfonyl group between the  
17 piperazine and cyclohexyl moieties, has a clogP of 3.28 whereas MCZ has a clogP of 4.31. This  
18 implies that the introduction of a sulfonyl group decreases hydrophobicity, and may thus increase  
19 solubility in physiological conditions and subsequently could have an important impact on  
20 bioavailability.

21           **Antitubercular activity.** The activity of all sPBTZ derivatives was tested *in vitro* against  
22 *M. tuberculosis* H37Rv and MIC<sub>99</sub> values were determined (Table 1). Most sPBTZ were active *in*  
23 *vitro* in the sub-micromolar range, proving that that addition of the sulfonyl group does not

1 abolish activity. However, none has a better activity than MCZ. 11626093, which has a butyl  
2 group, has the highest activity of MIC 1 ng/ $\mu$ L corresponding to 5 times the MIC<sub>99</sub> of MCZ. The  
3 introduction of a sulfone between the piperazine and the cyclohexyl negatively affected the  
4 activity of the compound, reducing activity by 30 fold, as observed with sPBTZ169 (11326127),  
5 which has an MIC<sub>99</sub> of 6 nM. It was previously shown that substituting the methylcyclohexyl in  
6 MCZ with small radicals such as methyl or ethyl decreases the activity of compounds, with MIC  
7 of 250 ng/mL and 60 ng/mL, respectively (5). Interestingly, when methylcyclohexyl is  
8 substituted by sulfonylmethyl (11626095) or sulfonylethyl (11626092), the activity decreases less  
9 and the compounds are 10-times more active than the non-sulfonated derivatives (MIC of 20  
10 ng/mL and 3 ng/mL, respectively). Substitution with a butyl leads to the same activity  
11 independent of the sulfonyl group. This observation indicates that the presence of the sulfonyl  
12 group positively affects activity when the radical is small (methyl or ethyl) whereas it negatively  
13 influences activity when the substituent is long and hydrophobic.

14 Similarly to the other BTZ derivatives, the activities of the sulfonyl derivatives are  
15 inversely proportional to the logP (4), suggesting that activity could be related to solubility in  
16 lipids (Figure S1). Seven molecules were selected based on their activity/logP profile for further  
17 characterisation (Figure S1).

18 **Target engagement and structural studies.** To ensure that sPBTZs specifically target  
19 DprE1, selected sulfonyl derivatives were tested against *M. tuberculosis* NTB1, a DprE1 mutant  
20 that carries a cysteine 387 serine (C387S) substitution and is thus resistant to BTZ. As expected,  
21 none of the sBTZs are active against NTB1, indicating that DprE1 is their only target (Table 2).  
22 Furthermore, it is evident that the sulfonyl group is unable to mimick the carboxylate moiety of  
23 2-carboxyquinoxalines in stabilising the compound in the pocket as a non-covalent inhibitor.

1 To investigate whether the introduction of the sulfonyl group could influence the position  
2 of the inhibitor and allow more contact within the binding pocket, a crystal structure of DprE1 in  
3 complex with sPBTZ169 was solved and compared to the crystal structure of DprE1 with MCZ.  
4 sPBTZ169 is located in the same pocket as MCZ and other BTZ derivatives. It sits in an  
5 hydrophobic pocket *via* the trifluoromethyl group and is covalently bound to C387 (Figure 1).  
6 The compound is maintained by Van der Waals interaction on each side by V365, Y314, W230  
7 and FAD, and a hydrogen bond between K418 and the oxygen atom of the nitro group of  
8 sPBTZ169. Unfortunately, the orientation of sPBTZ does not favor the formation of a new  
9 anchor to the protein for instance interaction between the sulfonyl function and Y60. Furthermore  
10 as MCZ, the electron density map does not account fully for the sulfonyl-cyclohexyl moiety of  
11 sPBTZ169 likely due to its higher flexibility demonstrating that sulfonyl is not stabilized in the  
12 pocket ((5)).

13 To determine whether the sulfonyl group could affect the activity at the protein level and  
14 even help to stabilize the inhibitor in the active site of a BTZ-resistant C387S DprE1 variant, the  
15 inhibition of DprE1 activity was measured *in vitro*. IC<sub>50</sub> values were determined for the wild type  
16 and the BTZ-resistant C387S mutant enzyme for MCZ and sPBTZ169 (Table S2). sPBTZ169  
17 has an IC<sub>50</sub> of 1.1 and 12  $\mu$ M against wild type and BTZ-resistant DprE1, respectively, whereas  
18 the corresponding IC<sub>50</sub> values for MCZ are 0.3 and 3.6  $\mu$ M. That introducing the sulfonyl group  
19 on the MCZ scaffold leads to 4-fold less activity suggests that even if the environment of the  
20 protein is favorable for an H-bond acceptor, the presence of a hydrophobic group, such as a  
21 cyclohexyl in MCZ, is still preferable for activity of the drug. On the other hand, the higher IC<sub>50</sub>  
22 against C387S compared to the WT enzyme validates the structural studies in that the sulfonyl  
23 group does not help to stabilize the molecule in the pocket of the BTZ-resistant mutant C387S.



1           **ADME/T.** To assess potential cytotoxic effects of the sulfonyl group on the sPBTZ  
2 derivatives, viability of HepG2 cells was monitored after exposure to different concentrations of  
3 the compounds. The concentration for half-maximal cytotoxicity ( $TD_{50}$ ) was determined for each  
4 compound. Four of the seven compounds were not cytotoxic (11326059, 11326127, 11626093,  
5 1162694) while three of them showed mild cytotoxicity at concentrations of around  $10 \mu\text{g/mL}$   
6 (1162691, 1162692, 1162695). Taken together, the selective index representing the ratio of the  
7 antitubercular activity of compounds ( $MIC_{99}$  on H37Rv) to cytotoxicity ( $TD_{50}$  on HepG2 cells) is  
8 more than acceptable for the chosen seven compounds.

9           Since solubility issues are often encountered in drug development, which would  
10 consequently impact bioavailability and activity *in vivo*, the solubility of these derivatives was  
11 calculated by the shake flask method in equilibrium in water. Experimental solubility constants  
12 measured were then compared to theoretical solubility constants calculated using the  
13 SwissADME webserver (26). sPBTZ are predicted to have increased solubility compared to  
14 MCZ in water (Table 3) and experimental solubility constants measured in water for all sPBTZ  
15 derivatives are consistent with theoretical constants calculated by SwissADME using different  
16 algorithms (Table 3). As expected, 11626095, 11626092 and 11626091, harboring methyl, ethyl  
17 and cyclopropyl groups, respectively, are the most soluble sPBTZ derivatives. In contrast,  
18 11326059, 11326127, 11626093, and 11626094 that carry bigger hydrophobic groups are at least  
19 100-times less soluble in water. Interestingly, there is a good correlation between water solubility  
20 and  $\text{clogP}$ . However, a discrepancy between the predicted and experimental solubility for MCZ  
21 was observed. In fact, MCZ is 400 times more soluble in water than calculated with different  
22 algorithms.

1 Another possible issue in the development of MCZ might be metabolic instability (5). In  
2 order to test if the sulfonyl group could improve metabolic stability effected by mouse or human  
3 liver enzymes, microsomal stability experiments were conducted. Compounds 11626095,  
4 11626091 and 11626092 harbouring the smallest radical chains methyl, ethyl and cyclopropyl,  
5 respectively, have the lowest clearances in both mouse and human microsomes, indicative of  
6 their stability. 11626093 carrying a butyl radical is metabolically stable in human but highly  
7 unstable in mouse microsomes, suggesting that it could be a good substrate for mouse but not  
8 human microsomal enzymes. Compounds 11326059 and 11326127 have medium clearances,  
9 similar to MCZ and BTZ043. Of note, 11626094 is highly unstable in the presence of human  
10 microsomes. These results reveal a strong correlation between the length of the substituent after  
11 the piperazine moiety and instability in microsomes.

12 **Activity in the murine model of chronic TB.** Finally, the *in vivo* efficacy of 1162691  
13 was assessed in the murine model of chronic TB following low-dose aerosol infection of  
14 BALB/cByJ mice with *M. tuberculosis* and treatment at 50 mg/kg (Figure 2). Compound  
15 1162691 was selected as it is the most promising taking into account its activity (“only” 15 times  
16 less active than MCZ), cytotoxicity, solubility, and metabolic stability properties.

17 Compared to the untreated control group, the bacterial burden in the lungs and spleens of  
18 1162691-treated mice was 0.46 (\*) and 1.03 (\*\*\*) log<sub>10</sub> CFU lower, respectively (Fig 2), whereas  
19 the values for those organs from MCZ-treated mice were 1.03 (\*\*\*) and 1.47 (\*\*\*) log<sub>10</sub> CFU.  
20 These results indicate that 1162691 is highly active *in vivo* in the murine model of chronic TB,  
21 although it is less able to reduce the bacterial load in the lungs than treatment with MCZ.  
22 Interestingly, 1162691 seems to be more efficacious in the spleen than in lungs.

23

## 1 DISCUSSION

2 Lead compounds for new anti-TB drugs should possess not only potent sterilizing activity but  
3 also good pharmacokinetic profiles to facilitate their co-administration with other anti-TB and  
4 anti-HIV (human immunodeficiency virus) agents. New drugs should also be appropriate for  
5 once daily oral dosing and be relatively inexpensive to produce to ensure that all high-burden  
6 countries have access. Structure-based rational drug design supports drug development and has  
7 the potential to increase the activity and pharmacokinetic properties of lead compounds.

8 The new sPBTZ series was designed as part of the MCZ back-up program. MCZ is a  
9 BCS (biopharmaceutical classification system) class 2 drug with a low dissolution rate but  
10 excellent absorption (5). Structural studies indicate that the environment of the binding pocket in  
11 the protein can accommodate a polar group at the cyclohexyl position of MCZ (3). A sulfonyl  
12 group was deemed to be a good candidate because it is well characterized and present in many  
13 soluble and metabolically stable FDA-approved drugs including those for treating mycobacterial  
14 infections. For instance, sulfamethoxazole is a sulfonamide drug used in co-trimoxazole  
15 prophylaxis for HIV-infected patients, demonstrating that it is compatible with anti-retroviral  
16 treatment (27).

17 It was previously shown that there is a strong correlation between logP and BTZ activity  
18 (4). We found that introduction of a sulfonyl group into the MCZ scaffold to form the sPBTZ  
19 series decreases both logP and activity *in vitro* (Table 1). However, sPBTZ still retain potency  
20 and the presence of the sulfonyl group improved aqueous solubility for those derivatives, which  
21 harbour small side chains, such as methyl, ethyl or cyclopropyl, as compared to MCZ (5).  
22 Interestingly, aqueous solubility and metabolic stability measured in microsomes indicate a better  
23 behaviour for sPBTZ with small groups rather than those with long hydrophobic chains or MCZ.

1 Despite being less active than MCZ our sulfonylated PBTZ with long hydrophobic chains,  
2 methyl (11626095), ethyl (11626092) or cyclopropyl (11626091) derivatives are considered as  
3 good candidates in terms of their solubility and metabolic stability profiles. The efficacy of the  
4 most active derivative of the three, 11626091, was assessed *in vivo* in the murine model of  
5 chronic TB, where relatively good activity was measured in the lungs and particularly in the  
6 spleens (Figure 2). It is also important to note that dissolution of 11626091 was considerably  
7 easier than MCZ in methylcellulose, the solvent used for the *in vivo* studies (technical  
8 observation, data not shown).

9 One of the objectives of inserting a sulfonyl group into the PBTZ backbone was to  
10 increase mitigate potential BTZ-resistance by increasing the number of hydrogen bonds with  
11 DprE1. Indeed, a sulfonyl could act as an H-bond acceptor in order to anchor the protein to the  
12 H-bond donors, for example the hydroxyl group of Tyrosine 60 localized in the binding pocket.  
13 This group was identified as a key player in the stabilization of 2-carboxyquinoxalines, molecules  
14 that remain active against BTZ-resistant DprE1. Unfortunately, as was observed in the crystal  
15 structure and enzymatic inhibition assays, the sulfonyl group of sPBTZ is not implicated in the  
16 binding and stabilization of the drug in the pocket as originally hypothesized. This explains the  
17 resistance of the BTZ-resistant *M. tuberculosis* mutant NTB1 to sPBTZ.

18 To conclude, our study identifies 11626091 as an active, metabolically stable and  
19 moderately soluble molecule that is less active than MCZ *in vitro* and *in vivo*. However, given its  
20 better solubility, compound 11626091 represents an attractive back-up to MCZ, that should now  
21 be tested in combination with other TB drug candidates such as bedaquiline in order to assess its  
22 potential to contribute to a new regimen.

23

## 1 MATERIALS AND METHODS

2       **Synthesis.** The synthetic route used to produce sPBTZ and related procedures are  
3 described in the supporting materials.

4       **Octanol-water partition coefficient log $P$  calculation.** The log $P$  values were calculated  
5 using the program Hyperchem 7.5 (Hypercube Inc., <http://www.hyper.com>).

6       **Bacterial strains and culture conditions.** *M. tuberculosis* strain H37Rv and its BTZ-  
7 resistant mutant (C387S) NTB1 were grown at 37°C with shaking in Middlebrook 7H9 broth  
8 (Difco) supplemented with 10% albumin-dextrose-catalase (ADC) enrichment, 0.2% glycerol,  
9 and 0.05% Tween 80. The *in vitro* activities against all mycobacterial strains were measured with  
10 the resazurin reduction microplate assay (REMA), by 2-fold serial dilutions of the compounds in  
11 the working bacterial culture in 96-well plates (final volume of 100  $\mu$ l). Following incubation for  
12 6 days at 37°C bacterial viability was determined by adding resazurin for 24 h at 37°C and  
13 measuring the fluorescence of the resorufin metabolite (excitation wavelength, 560 nm; emission  
14 wavelength, 590 nm) using a Tecan Infinite M200 microplate reader. Briefly, the noise signal  
15 obtained in the blank control wells was subtracted from the fluorescence values of test samples  
16 and mycobacterial viability in each well were proportionally calculated compared to 100%  
17 growth in control wells. Bacterial viability curves and MIC<sub>99</sub> value were calculated with  
18 GraphPad Prism software version 7.0, using “Gompertz equation for MIC determination”  
19 analysis (GraphPad Software, Inc., La Jolla, CA, USA).

20       **Cytotoxicity studies.** The cytotoxicity of the compounds was measured as described  
21 previously against the human hepatic cell line, HepG2, (20). Briefly, cells were incubated (4,000  
22 cells/well) with serial dilutions of compounds (2-fold dilutions; 100 to 0.1  $\mu$ g/ml) in a 96-well  
23 microplate. Following incubation for 3 days at 37°C cell viability was determined by adding

1    resazurin for 4 h at 37°C and measuring the fluorescence of the resorufin metabolite (excitation  
2    wavelength, 560 nm; emission wavelength, 590 nm) using a Tecan Infinite M200 microplate  
3    reader. Data were corrected for background (no-cell control) and expressed as a percentage of the  
4    value for untreated cells (cells only).

5           Data were fitted to obtain IC<sub>50</sub> values, using “Log(inhibitor) vs. response – Variable  
6    slope” function implemented in GraphPad Prism software version 7.0 (GraphPad Software, Inc.,  
7    La Jolla, CA, USA). Selective index refers to the ratio of the dose of drug that causes toxicity  
8    effects (TD50) to the dose that leads to the desired pharmacological effect (MIC<sub>99</sub>).

9           **Water Solubility.** Water solubility measurements were performed using the shake flask  
10   method ((28)). Approximately 1 mL was added to 1 mg of compound in an Eppendorf tube and  
11   incubated for 3 days at 25°C with shaking at 800 rpm. Suspensions were centrifuged at 16,100 x  
12   g for 10 min and the supernatant filtered using 0.22 μ filters. Filtrates were injected onto a high-  
13   performance liquid chromatography (HPLC) column (Dionex) and the amount of compound  
14   quantified using a calibration curve.

15           **Inhibition assays, crystallography and structural studies of DprE1 complexed with**  
16   **sPBTZ.** Recombinant *M. tuberculosis* DprE1 was overexpressed and purified as described  
17   previously (5) to obtain highly concentrated and pure protein with bound flavin adenine  
18   dinucleotide (FAD). Enzyme activities in the presence of MCZ, Ty38c and 11326127 were  
19   measured as described previously to determine IC<sub>50</sub> (50% inhibitory concentrations) values for  
20   both wild-type and C131S mutant DprE1 proteins (14).

21   For crystallization purposes, *M. tuberculosis* DprE1 (approximately 40 μ M) was incubated for  
22   3h at 30 °C, with 200 μ M sulfonyl-BTZ 11326127 and 200 μ M FPR (farnesyl phosphoribose),  
23   in 20 mM Tris pH 8.5, 50 mM NaCl. The protein was concentrated to approximately 15 mg/mL

1 on an Amicon centrifugal device (30,000 MWCO, Millipore). Crystals were obtained by the  
2 hanging-drop vapor diffusion method at 18 °C. Experiments were set up by mixing 1  $\mu$ l of the  
3 protein sample with 1  $\mu$ l of the reservoir solution containing 100 mM imidazole, pH 7.2-7.5, 18-  
4 24 % polypropyleneglycol 400. Yellow crystals grew in approximately 1-3 days and were  
5 transferred to a cryo-protectant (reservoir solution with 25% glycerol) prior to flash-cooling in  
6 liquid nitrogen.

7 X-ray data were collected at SLS, beamline PROXIMA 3. Data were integrated with the  
8 program XDS (29) and processed using PHENIX (30). Structure was solved by molecular  
9 replacement using PHENIX (31) and the structure of *M. tuberculosis* DprE1 (PDB code : 4NCR,  
10 (5)) as a template. Molecular replacement was subjected to iterative rounds of refinement and  
11 rebuilding in coot (32) and PHENIX. The coordinates and structure factors have been deposited  
12 in the Brookhaven Protein Data Bank (accession numbers 6G83).

13 **Metabolic stability *in vitro*.** The intrinsic clearance ( $CL_{int}$ ) of compounds was measured  
14 in both mouse and human liver microsomes. Briefly, 100  $\mu$ g of mouse (CD-1) or human liver  
15 microsomes (both from Invitrogen) were mixed in 0.1M phosphate buffer (pH 7.4) containing  
16 0.01  $\mu$ l of compound dissolved in DMSO at 10 mg/ml, in a final volume of 50  $\mu$ l. In parallel, a  
17 NADPH-regenerating system (Promega) was prepared in 0.1 M phosphate buffer (pH 7.4). The  
18 solutions were pre-incubated at 37°C for 10 min before the intrinsic clearance assessment was  
19 initiated by mixing the two solutions (50  $\mu$ l of each; final compound concentration, 1  $\mu$ g/ml) at  
20 37°C. After 0, 5, 15, 30, and 60 min, the reactions were terminated by transferring 100  $\mu$ l of the  
21 reaction mixture into 100  $\mu$ l of acetonitrile and placing the mixture on ice for 30 min for full  
22 protein precipitation. Samples were then centrifuged at 12,000 x g for 10 min, and the  
23 supernatant was injected onto a high-performance liquid chromatography (HPLC) column

1 (Dionex) to quantify the amount of parent compound remaining over time. Carbamazepine and  
2 Nifedipine at the same concentrations were used as controls for low and high intrinsic clearances  
3 respectively.

4 **Anti-mycobacterial activity of 11626091 against chronic TB in mice.** Female  
5 BALB/cByJ mice, aged 5 to 6 weeks, were purchased from Charles River Laboratories (France).  
6 Mice were infected with a low dose aerosol (100 – 200 CFU/lung) of logarithmic-phase *M.*  
7 *tuberculosis* H37Rv bacilli, then were allocated to experimental groups and returned to their  
8 cages. Five mice were used per time point for each regimen. Treatment was initiated 4 weeks  
9 after infection.

10 Macozinone (MCZ), 11626091, and isoniazid (INH) were prepared weekly in 0.5%  
11 methylcellulose and administered at 25, 50, and 10 mg/kg, respectively, by gavage 5 days a week  
12 for 4 weeks. *In vivo* efficacy of each treatment was assessed by CFU enumeration after plating  
13 dilutions of the lung and spleen homogenates on 7H10 agar plates containing 10% OADC,  
14 cycloheximide (10 µg/ml), and ampicillin (50 µg/ml). Plates were incubated for 4 weeks at 37°C  
15 before CFU were enumerated. CFU counts were log<sub>10</sub> transformed before analysis as mean  
16 log<sub>10</sub> CFU ± standard deviation (SD), and were compared by Student's t-test using GraphPad  
17 Prism® version 7.0 software (GraphPad Software, Inc., La Jolla, CA, USA). P values less than  
18 0.05 were considered as statistically significant.

19 Experiments were approved by the Swiss Cantonal Veterinary Authority (authorization  
20 no. 3082) and performed between June-August 2017.

21

## 22 **ACKNOWLEDGMENTS**

23 The research leading to these results was performed as part of the More Medicines for



1 Tuberculosis (MM4TB) project and received funding from the European Community's Seventh  
2 Framework Programme ([FP7/ 2007-2013]) under grant agreement no. 260872. We thank Aline  
3 Reynaud and Florence Pojer from the Ppsc facility at EPFL for their technical support.

4

## 5 REFERENCES

- 6 1. Mikusova K, Huang H, Yagi T, Holsters M, Vereecke D, D'Haese W, Scherman MS,  
7 Brennan PJ, McNeil MR, Crick DC. 2005. Decaprenylphosphoryl arabinofuranose, the  
8 donor of the D-arabinofuranosyl residues of mycobacterial arabinan, is formed via a two-  
9 step epimerization of decaprenylphosphoryl ribose. *Journal of bacteriology* 187:8020-5.
- 10 2. Brecik M, Centarova I, Mukherjee R, Kolly GS, Huszar S, Bobovska A, Kilacskova E,  
11 Mocosova V, Svetlikova Z, Sarkan M, Neres J, Kordulakova J, Cole ST, Mikusova K.  
12 2015. DprE1 Is a Vulnerable Tuberculosis Drug Target Due to Its Cell Wall Localization.  
13 *ACS Chem Biol* 10:1631-6.
- 14 3. Piton J, Foo CS, Cole ST. 2016. Structural studies of *Mycobacterium tuberculosis* DprE1  
15 interacting with its inhibitors. *Drug Discov Today* doi:10.1016/j.drudis.2016.09.014.
- 16 4. Makarov V, Manina G, Mikusova K, Mollmann U, Ryabova O, Saint-Joanis B, Dhar N,  
17 Pasca MR, Buroni S, Lucarelli AP, Milano A, De Rossi E, Belanova M, Bobovska A,  
18 Dianiskova P, Kordulakova J, Sala C, Fullam E, Schneider P, McKinney JD, Brodin P,  
19 Christophe T, Waddell S, Butcher P, Albrethsen J, Rosenkrands I, Brosch R, Nandi V,  
20 Bharath S, Gaonkar S, Shandil RK, Balasubramanian V, Balganesch T, Tyagi S, Grosset J,  
21 Riccardi G, Cole ST. 2009. Benzothiazinones kill *Mycobacterium tuberculosis* by  
22 blocking arabinan synthesis. *Science* 324:801-4.
- 23 5. Makarov V, Lechartier B, Zhang M, Neres J, van der Sar AM, Raadsen SA, Hartkoorn  
24 RC, Ryabova OB, Vocat A, Decosterd LA, Widmer N, Buclin T, Bitter W, Andries K,  
25 Pojer F, Dyson PJ, Cole ST. 2014. Towards a new combination therapy for tuberculosis  
26 with next generation benzothiazinones. *EMBO Mol Med* 6:372-83.
- 27 6. Batt SM, Jabeen T, Bhowruth V, Quill L, Lund PA, Eggeling L, Alderwick LJ, Futterer  
28 K, Besra GS. 2012. Structural basis of inhibition of *Mycobacterium tuberculosis* DprE1  
29 by benzothiazinone inhibitors. *Proc Natl Acad Sci U S A* 109:11354-9.

- 1 7. Trefzer C, Rengifo-Gonzalez M, Hinner MJ, Schneider P, Makarov V, Cole ST, Johnsson  
2 K. 2010. Benzothiazinones: prodrugs that covalently modify the decaprenylphosphoryl-  
3 beta-D-ribose 2'-epimerase DprE1 of *Mycobacterium tuberculosis*. *J Am Chem Soc*  
4 132:13663-5.
- 5 8. Neres J, Pojer F, Molteni E, Chiarelli LR, Dhar N, Boy-Rottger S, Buroni S, Fullam E,  
6 Degiacomi G, Lucarelli AP, Read RJ, Zanoni G, Edmondson DE, De Rossi E, Pasca MR,  
7 McKinney JD, Dyson PJ, Riccardi G, Mattevi A, Cole ST, Binda C. 2012. Structural  
8 basis for benzothiazinone-mediated killing of *Mycobacterium tuberculosis*. *Science*  
9 *translational medicine* 4:150ra121.
- 10 9. Christophe T, Jackson M, Jeon HK, Fenistein D, Contreras-Dominguez M, Kim J,  
11 Genovesio A, Carralot JP, Ewann F, Kim EH, Lee SY, Kang S, Seo MJ, Park EJ,  
12 Skovierova H, Pham H, Riccardi G, Nam JY, Marsollier L, Kempf M, Joly-Guillou ML,  
13 Oh T, Shin WK, No Z, Nehrbass U, Brosch R, Cole ST, Brodin P. 2009. High content  
14 screening identifies decaprenyl-phosphoribose 2' epimerase as a target for intracellular  
15 antimycobacterial inhibitors. *PLoS Pathog* 5:e1000645.
- 16 10. Magnet S, Hartkoorn RC, Szekely R, Pato J, Triccas JA, Schneider P, Szantai-Kis C, Orfi  
17 L, Chambon M, Banfi D, Bueno M, Turcatti G, Keri G, Cole ST. 2010. Leads for  
18 antitubercular compounds from kinase inhibitor library screens. *Tuberculosis (Edinb)*  
19 90:354-60.
- 20 11. Stanley SA, Grant SS, Kawate T, Iwase N, Shimizu M, Wivagg C, Silvis M,  
21 Kazyanskaya E, Aquadro J, Golas A, Fitzgerald M, Dai H, Zhang L, Hung DT. 2012.  
22 Identification of novel inhibitors of *M. tuberculosis* growth using whole cell based high-  
23 throughput screening. *ACS Chem Biol* 7:1377-84.
- 24 12. Landge S, Mullick AB, Nagalapur K, Neres J, Subbulakshmi V, Murugan K, Ghosh A,  
25 Sadler C, Fellows MD, Humnabadkar V, Mahadevaswamy J, Vachaspati P, Sharma S,  
26 Kaur P, Mallya M, Rudrapatna S, Awasthy D, Sambandamurthy VK, Pojer F, Cole ST,  
27 Balganesht TS, Ugarkar BG, Balasubramanian V, Bhandodkar BS, Panda M,  
28 Ramachandran V. 2015. Discovery of benzothiazoles as antimycobacterial agents:  
29 Synthesis, structure-activity relationships and binding studies with *Mycobacterium*  
30 *tuberculosis* decaprenylphosphoryl-beta-D-ribose 2'-oxidase. *Bioorg Med Chem* 23:7694-  
31 710.

- 1 13. Landge S, Ramachandran V, Kumar A, Neres J, Murugan K, Sadler C, Fellows MD,  
2 Humnabadkar V, Vachaspati P, Raichurkar A, Sharma S, Ravishankar S, Gupta S,  
3 Sambandamurthy VK, Balganeshts, Ugarkar BG, Balasubramanian V, Bhandodkar BS,  
4 Panda M. 2016. Nitroarenes as Antitubercular Agents: Stereoelectronic Modulation to  
5 Mitigate Mutagenicity. *ChemMedChem* 11:331-9.
- 6 14. Foo CS, Lechartier B, Kolly GS, Boy-Rottger S, Neres J, Rybniker J, Lupien A, Sala C,  
7 Piton J, Cole ST. 2016. Characterization of DprE1-Mediated Benzothiazinone Resistance  
8 in *Mycobacterium tuberculosis*. *Antimicrob Agents Chemother* 60:6451-6459.
- 9 15. Wang F, Sambandan D, Halder R, Wang J, Batt SM, Weinrick B, Ahmad I, Yang P,  
10 Zhang Y, Kim J, Hassani M, Huszar S, Trefzer C, Ma Z, Kaneko T, Mdluli KE,  
11 Franzblau S, Chatterjee AK, Johnsson K, Mikusova K, Besra GS, Futterer K, Robbins  
12 SH, Barnes SW, Walker JR, Jacobs WR, Jr., Schultz PG. 2013. Identification of a small  
13 molecule with activity against drug-resistant and persistent tuberculosis. *Proc Natl Acad  
14 Sci U S A* 110:E2510-7.
- 15 16. Shirude PS, Shandil R, Sadler C, Naik M, Hosagrahara V, Hameed S, Shinde V, Bathula  
16 C, Humnabadkar V, Kumar N, Reddy J, Panduga V, Sharma S, Ambady A, Hegde N,  
17 Whiteaker J, McLaughlin RE, Gardner H, Madhavapeddi P, Ramachandran V, Kaur P,  
18 Narayan A, Gupta S, Awasthy D, Narayan C, Mahadevaswamy J, Vishwas KG, Ahuja  
19 V, Srivastava A, Prabhakar KR, Bharath S, Kale R, Ramaiah M, Choudhury NR,  
20 Sambandamurthy VK, Solapure S, Iyer PS, Narayanan S, Chatterji M. 2013. Azaindoles:  
21 noncovalent DprE1 inhibitors from scaffold morphing efforts, kill *Mycobacterium  
22 tuberculosis* and are efficacious in vivo. *J Med Chem* 56:9701-8.
- 23 17. Chatterji M, Shandil R, Manjunatha MR, Solapure S, Ramachandran V, Kumar N,  
24 Saralaya R, Panduga V, Reddy J, Prabhakar KR, Sharma S, Sadler C, Cooper CB, Mdluli  
25 K, Iyer PS, Narayanan S, Shirude PS. 2014. 1,4-azaindole, a potential drug candidate for  
26 treatment of tuberculosis. *Antimicrob Agents Chemother* 58:5325-31.
- 27 18. Neres J, Hartkoorn RC, Chiarelli LR, Gadupudi R, Pasca MR, Mori G, Venturelli A,  
28 Savina S, Makarov V, Kolly GS, Molteni E, Binda C, Dhar N, Ferrari S, Brodin P,  
29 Delorme V, Landry V, de Jesus Lopes Ribeiro AL, Farina D, Saxena P, Pojer F, Carta A,  
30 Luciani R, Porta A, Zanoni G, De Rossi E, Costi MP, Riccardi G, Cole ST. 2015. 2-

- 1 Carboxyquinoxalines kill mycobacterium tuberculosis through noncovalent inhibition of  
2 DprE1. *ACS Chem Biol* 10:705-14.
- 3 19. Naik M, Humnabadkar V, Tantry SJ, Panda M, Narayan A, Guptha S, Panduga V,  
4 Manjrekar P, Jena LK, Koushik K, Shanbhag G, Jatheendranath S, Manjunatha MR,  
5 Gorai G, Bathula C, Rudrapatna S, Achar V, Sharma S, Ambady A, Hegde N,  
6 Mahadevaswamy J, Kaur P, Sambandamurthy VK, Awasthy D, Narayan C, Ravishankar  
7 S, Madhavapeddi P, Reddy J, Prabhakar K, Saralaya R, Chatterji M, Whiteaker J,  
8 McLaughlin B, Chiarelli LR, Riccardi G, Pasca MR, Binda C, Neres J, Dhar N,  
9 Signorino-Gelo F, McKinney JD, Ramachandran V, Shandil R, Tommasi R, Iyer PS,  
10 Narayanan S, Hosagrahara V, Kavanagh S, Dinesh N, Ghorpade SR. 2014. 4-  
11 aminoquinolone piperidine amides: noncovalent inhibitors of DprE1 with long residence  
12 time and potent antimycobacterial activity. *J Med Chem* 57:5419-34.
- 13 20. Makarov V, Neres J, Hartkoorn RC, Ryabova OB, Kazakova E, Sarkan M, Huszar S,  
14 Piton J, Kolly GS, Vocat A, Conroy TM, Mikusova K, Cole ST. 2015. The 8-Pyrrole-  
15 Benzothiazinones Are Noncovalent Inhibitors of DprE1 from *Mycobacterium*  
16 *tuberculosis*. *Antimicrob Agents Chemother* 59:4446-52.
- 17 21. Shaikh MH, Subhedar DD, Arkile M, Khedkar VM, Jadhav N, Sarkar D, Shingate BB.  
18 2016. Synthesis and bioactivity of novel triazole incorporated benzothiazinone derivatives  
19 as antitubercular and antioxidant agent. *Bioorg Med Chem Lett* 26:561-9.
- 20 22. Tiwari R, Miller PA, Chiarelli LR, Mori G, Sarkan M, Centarova I, Cho S, Mikusova K,  
21 Franzblau SG, Oliver AG, Miller MJ. 2016. Design, Syntheses, and Anti-TB Activity of  
22 1,3-Benzothiazinone Azide and Click Chemistry Products Inspired by BTZ043. *ACS Med*  
23 *Chem Lett* 7:266-70.
- 24 23. Panda M, Ramachandran S, Ramachandran V, Shirude PS, Humnabadkar V, Nagalapur  
25 K, Sharma S, Kaur P, Guptha S, Narayan A, Mahadevaswamy J, Ambady A, Hegde N,  
26 Rudrapatna SS, Hosagrahara VP, Sambandamurthy VK, Raichurkar A. 2014. Discovery  
27 of pyrazolopyridones as a novel class of noncovalent DprE1 inhibitor with potent anti-  
28 mycobacterial activity. *J Med Chem* 57:4761-71.
- 29 24. Chikhale R, Menghani S, Babu R, Bansode R, Bhargavi G, Karodia N, Rajasekharan MV,  
30 Paradkar A, Khedekar P. 2015. Development of selective DprE1 inhibitors: Design,

- 1 synthesis, crystal structure and antitubercular activity of benzothiazolylpyrimidine-5-  
2 carboxamides. *Eur J Med Chem* 96:30-46.
- 3 25. Amidon GL, Lennernas H, Shah VP, Crison JR. 1995. A theoretical basis for a  
4 biopharmaceutic drug classification: the correlation of in vitro drug product dissolution  
5 and in vivo bioavailability. *Pharm Res* 12:413-20.
- 6 26. Daina A, Michielin O, Zoete V. 2017. SwissADME: a free web tool to evaluate  
7 pharmacokinetics, drug-likeness and medicinal chemistry friendliness of small molecules.  
8 *Sci Rep* 7:42717.
- 9 27. Guidelines W. 2014. Guidelines on Post-Exposure Prophylaxis for HIV and the Use of  
10 Co-Trimoxazole Prophylaxis for HIV-Related Infections Among Adults, Adolescents and  
11 Children: Recommendations for a Public Health Approach: December 2014 supplement  
12 to the 2013 consolidated guidelines on the use of antiretroviral drugs for treating and  
13 preventing HIV infection, Geneva.
- 14 28. Bergstrom CA, Wassvik CM, Johansson K, Hubatsch I. 2007. Poorly soluble marketed  
15 drugs display solvation limited solubility. *J Med Chem* 50:5858-62.
- 16 29. Kabsch W. 2010. Integration, scaling, space-group assignment and post-refinement. *Acta*  
17 *Crystallogr D Biol Crystallogr* 66:133-44.
- 18 30. Adams PD, Afonine PV, Bunkoczi G, Chen VB, Davis IW, Echols N, Headd JJ, Hung  
19 LW, Kapral GJ, Grosse-Kunstleve RW, McCoy AJ, Moriarty NW, Oeffner R, Read RJ,  
20 Richardson DC, Richardson JS, Terwilliger TC, Zwart PH. 2010. PHENIX: a  
21 comprehensive Python-based system for macromolecular structure solution. *Acta*  
22 *Crystallogr D Biol Crystallogr* 66:213-21.
- 23 31. McCoy AJ, Grosse-Kunstleve RW, Adams PD, Winn MD, Storoni LC, Read RJ. 2007.  
24 Phaser crystallographic software. *J Appl Crystallogr* 40:658-674.
- 25 32. Emsley P, Cowtan K. 2004. Coot: model-building tools for molecular graphics. *Acta*  
26 *Crystallogr D Biol Crystallogr* 60:2126-32.

27  
28  
29

1 **Table 1: Structure activity relationship of the different 2-sulphonylpiperazin 8-nitro 6-**  
 2 **trifluoromethyl 1,3-benzothiazin-4-ones derivatives (sulfonyl PBTZ derivatives) in *M.***  
 3 ***tuberculosis* H37Rv**  
 4

| Compound Name | Molecular structure                                                                 | clogP | MIC <sub>99</sub> H37Rv (µg/mL) | Compound Name | Molecular structure                                                                  | clogP | MIC <sub>99</sub> H37Rv (µg/mL) |
|---------------|-------------------------------------------------------------------------------------|-------|---------------------------------|---------------|--------------------------------------------------------------------------------------|-------|---------------------------------|
| PBTZ169       | 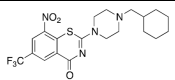   | 4.31  | 0.0002                          | 11326121      |    | 3.62  | 0.03                            |
| Rifampicin    |    | 3.7   | 0.0008                          | 11326056      |    | 1.79  | 0.06                            |
| 11626093      |    | 2.69  | 0.001                           | 11326120      |    | 4.56  | 0.1                             |
| 11626091      |    | 2     | 0.003                           | 11326123      |    | 3.98  | 0.1                             |
| 11626092      |    | 1.82  | 0.003                           | 11326128      |    | 2.59  | 0.1                             |
| 11326059      |    | 2.6   | 0.004                           | 11326058      |    | 2.35  | 0.4                             |
| 11326127      |   | 3.28  | 0.006                           | 11326061      |   | 1.81  | 0.4                             |
| 11626094      |  | 3.1   | 0.01                            | 11326125      |  | 5.23  | 0.5                             |
| 11626095      |  | 1.36  | 0.02                            | 11326122      |  | 4.51  | 0.8                             |
|               |                                                                                     |       |                                 | 11326126      |  | 1.33  | 1.6                             |
|               |                                                                                     |       |                                 | 11326119      |  | 0.15  | 50                              |
|               |                                                                                     |       |                                 | 11326124      |  | 5.06  | 800                             |

5  
 6  
 7  
 8  
 9  
 10

1 **Table 2: *In vitro* activity of selected sPBTZ derivatives against *M. tuberculosis* H37Rv and**  
2 **its BTZ-resistant mutant (NTB1) and cytotoxicity for HepG2 cells**

3  
4

| Compound<br>Name | H37Rv<br>MIC <sub>99</sub><br>( $\mu\text{g}/\text{mL}$ ) | NTB1<br>MIC <sub>99</sub><br>( $\mu\text{g}/\text{mL}$ ) | TD50<br>( $\mu\text{g}/\text{mL}$ ) | Selective<br>index |
|------------------|-----------------------------------------------------------|----------------------------------------------------------|-------------------------------------|--------------------|
| 11326059         | 0.004                                                     | >100                                                     | 100                                 | 25000              |
| 11326127         | 0.006                                                     | >100                                                     | >100                                | >16666             |
| 11626091         | 0.003                                                     | 14.7                                                     | 8.10                                | 2700               |
| 11626092         | 0.003                                                     | 25.1                                                     | 8.90                                | 2967               |
| 11626093         | 0.001                                                     | >100                                                     | >100                                | >100000            |
| 11626094         | 0.01                                                      | >100                                                     | 100.00                              | 10000              |
| 11626095         | 0.02                                                      | 75                                                       | 7.80                                | 390                |
| PBTZ169          | 0.0002                                                    | >100                                                     | 44.00                               | 220000             |
| Rifampicin       | 0.0008                                                    | 0.0008                                                   | 100.00                              | 125000             |

5

6

1 **Table 3: Water solubility of selected sPBTZ derivatives measured by shake flask method**  
2 **compared to solubility calculated on SwissAdme ((26))**

3

| <b>Compound</b> | <b>Solubility measured</b>                    | <b>Solubility calculated</b>                  |              |
|-----------------|-----------------------------------------------|-----------------------------------------------|--------------|
| <b>Name</b>     | <b>in water (<math>\mu\text{g/mL}</math>)</b> | <b>in water (<math>\mu\text{g/ml}</math>)</b> | <b>clogP</b> |
| 11326059        | <0.01                                         | 0.12                                          | 2.6          |
| 11326127        | <0.01                                         | 0.26                                          | 3.28         |
| 11626091        | 8.6 $\pm$ 3.8                                 | 4.69                                          | 1.91         |
| 11626092        | 10.7 $\pm$ 4.6                                | 7.2                                           | 2            |
| 11626093        | 0.105 $\pm$ 0.05                              | 0.93                                          | 2.69         |
| 11626094        | 0.088 $\pm$ 0.04                              | 0.18                                          | 3.1          |
| 11626095        | 10.6 $\pm$ 1.8                                | 16.9                                          | 1.36         |
| PBTZ169         | 31.1 $\pm$ 6.4                                | 0.0795                                        | 4.31         |

4



1 **Table 4: Metabolic stability of sPBTZ derivatives measured in mouse and human**  
2 **microsomes**

3  
4

| <b>Compound Name</b> | <b>Cl<sub>int</sub> mouse<br/>microsome<br/>(<math>\mu\text{l}/\text{min}/\text{mg}</math> protein)</b> | <b>Cl<sub>int</sub> human microsome<br/>(<math>\mu\text{l}/\text{min}/\text{mg}</math> protein)</b> | <b>References</b> |
|----------------------|---------------------------------------------------------------------------------------------------------|-----------------------------------------------------------------------------------------------------|-------------------|
| 11326059             | 18.6                                                                                                    | 16.8                                                                                                | This study        |
| 11326127             | 19                                                                                                      | 21.5                                                                                                | This study        |
| 11626091             | 2.7                                                                                                     | 9.7                                                                                                 | This study        |
| 11626092             | 3                                                                                                       | 1.4                                                                                                 | This study        |
| 11626093             | 42                                                                                                      | 6.4                                                                                                 | This study        |
| 11626094             | 24                                                                                                      | 277                                                                                                 | This study        |
| 11626095             | 0.9                                                                                                     | 1.0                                                                                                 | This study        |
| Carbamazepine        | 0.6                                                                                                     | 0.4                                                                                                 | This study        |
| Nifedipine           | 105                                                                                                     | 121.1                                                                                               | This study        |
| PBTZ169              | 36.7                                                                                                    | 28                                                                                                  | (5)               |
| BTZ043               | 16.5                                                                                                    | 4.20                                                                                                | (5)               |

5

6

1  
2 **Figure 1: Structural comparison between the crystal structure of DprE1 in complex with**  
3 **sulfonyl derivative sPBTZ169 (11326127) and the structure in complex with MCZ (PDB**  
4 **code : 4NCR (5)). DprE1 is represented in green in the cartoon. sPBTZ169 (in red) sits in the**  
5 **trifluoromethyl hydrophobic pocket (in yellow) and binds covalently to C387. It is maintained**  
6 **by FAD (orange) and some lateral chains represented in sticks. Y60, a key residue in the binding**  
7 **of 2-Carboxyquinoxalines, is represented in pink.**

8

1 **Figure 2: Activity of the sPBTZ derivative 11626091 (50 mg/kg ) compared to *in vivo***  
2 **activity of INH (10 mg/kg) or MCZ (25 mg/kg) in the mouse model of chronic TB.** Black  
3 columns correspond to the bacterial burden in lungs and red columns correspond to the bacterial  
4 burden in the spleens, at day 0 (D0) when treatment was initiated, or day 28 (NT) when treatment  
5 ended. Bars represent the mean  $\pm$  s.d. of CFUs from 5 mice per group. NT: untreated control.  
6 Limit of detection: 20 CFU/organ. The significance of difference was calculated using the  
7 Student t-test. \*P<0.05. \*\*P<0.005. \*\*\*P<0.0001 compared to NT.

8

9

10

11

12

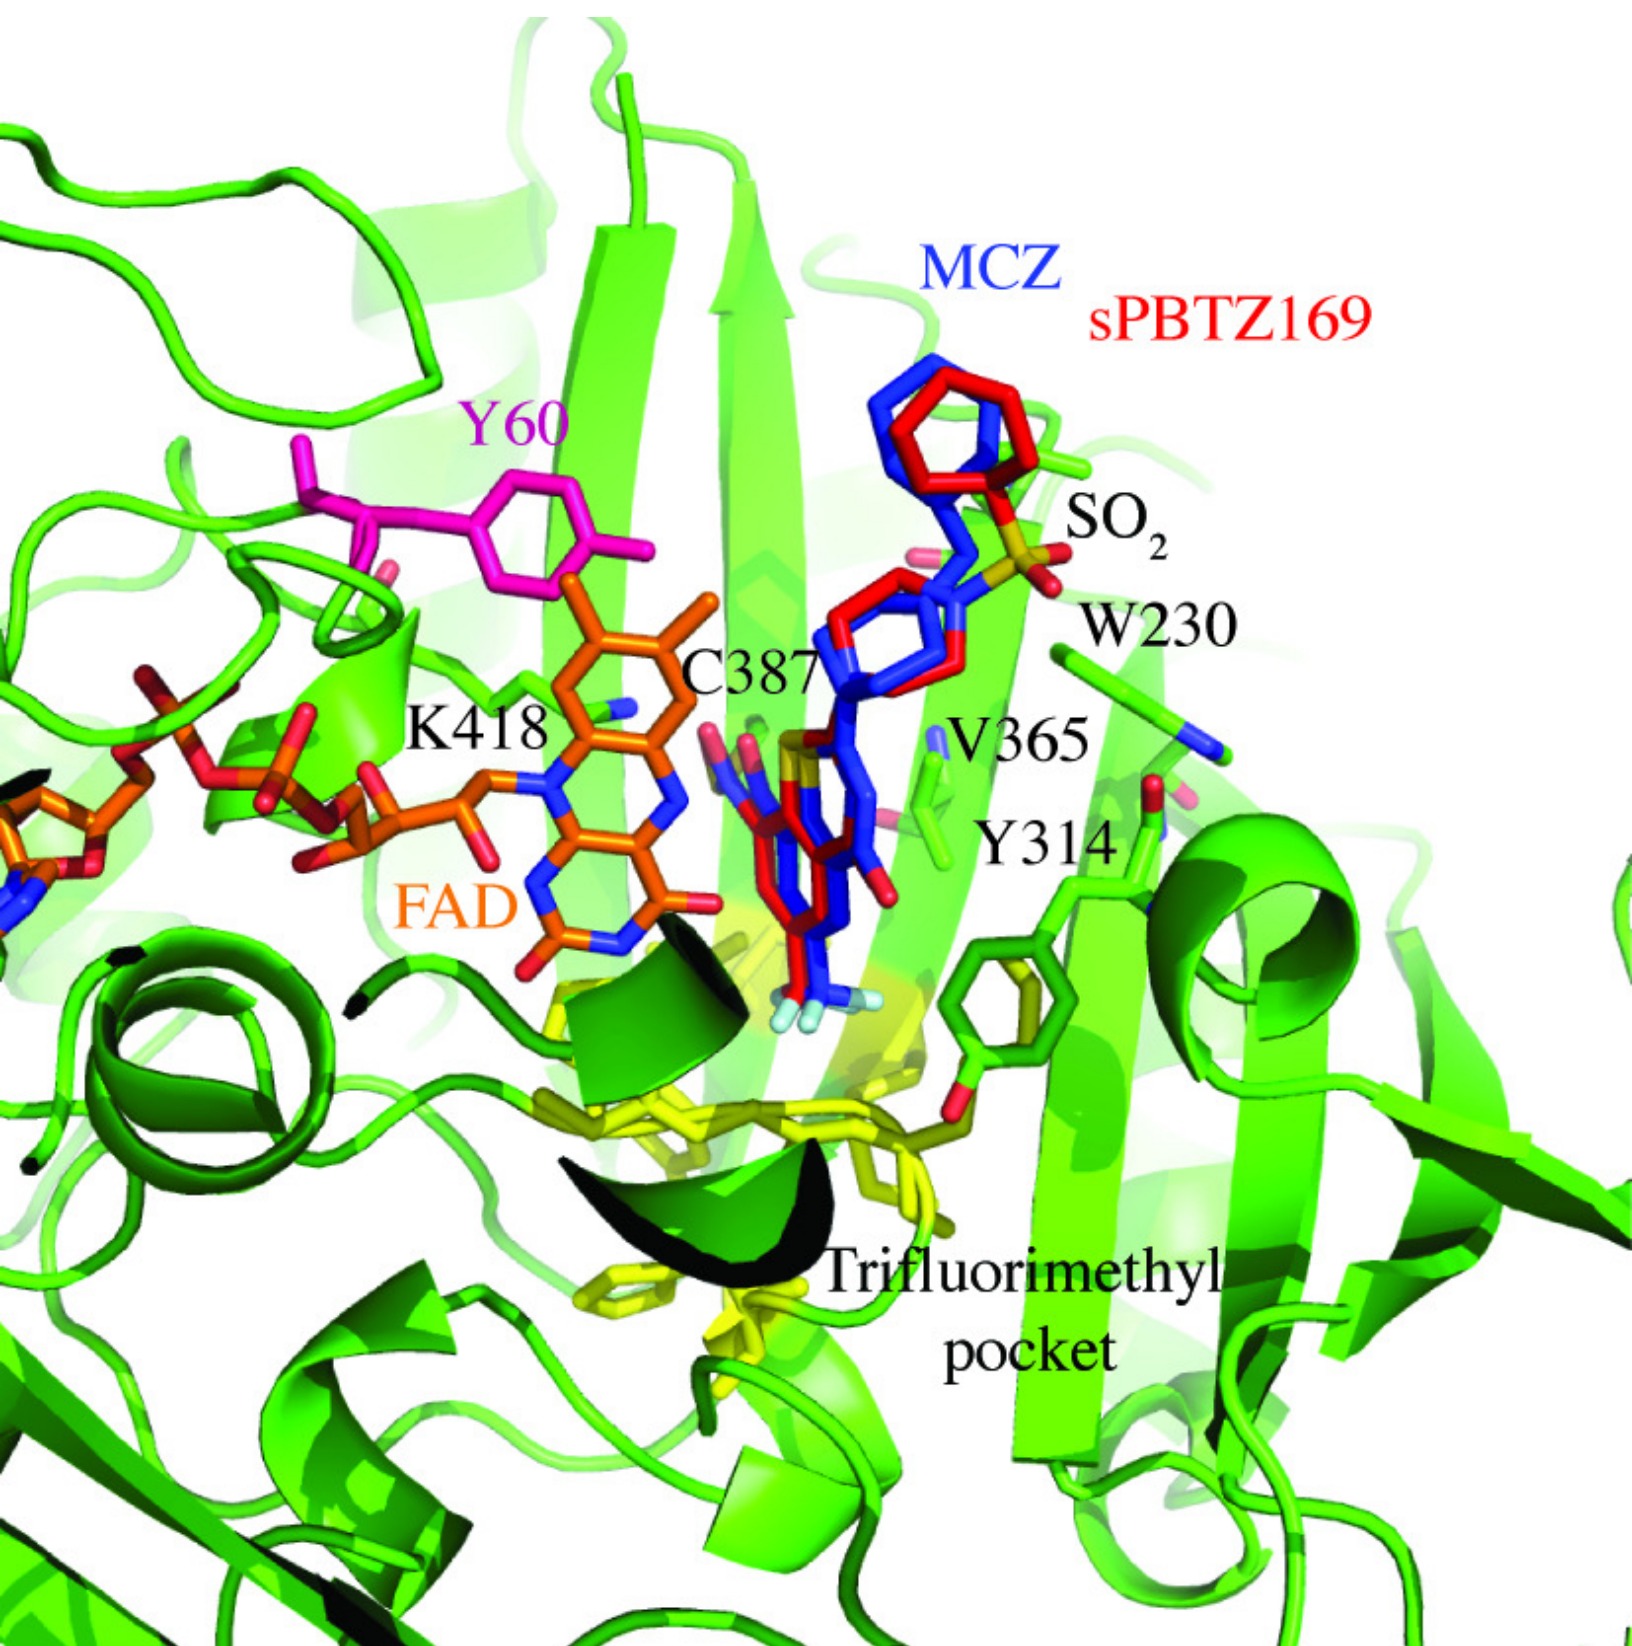

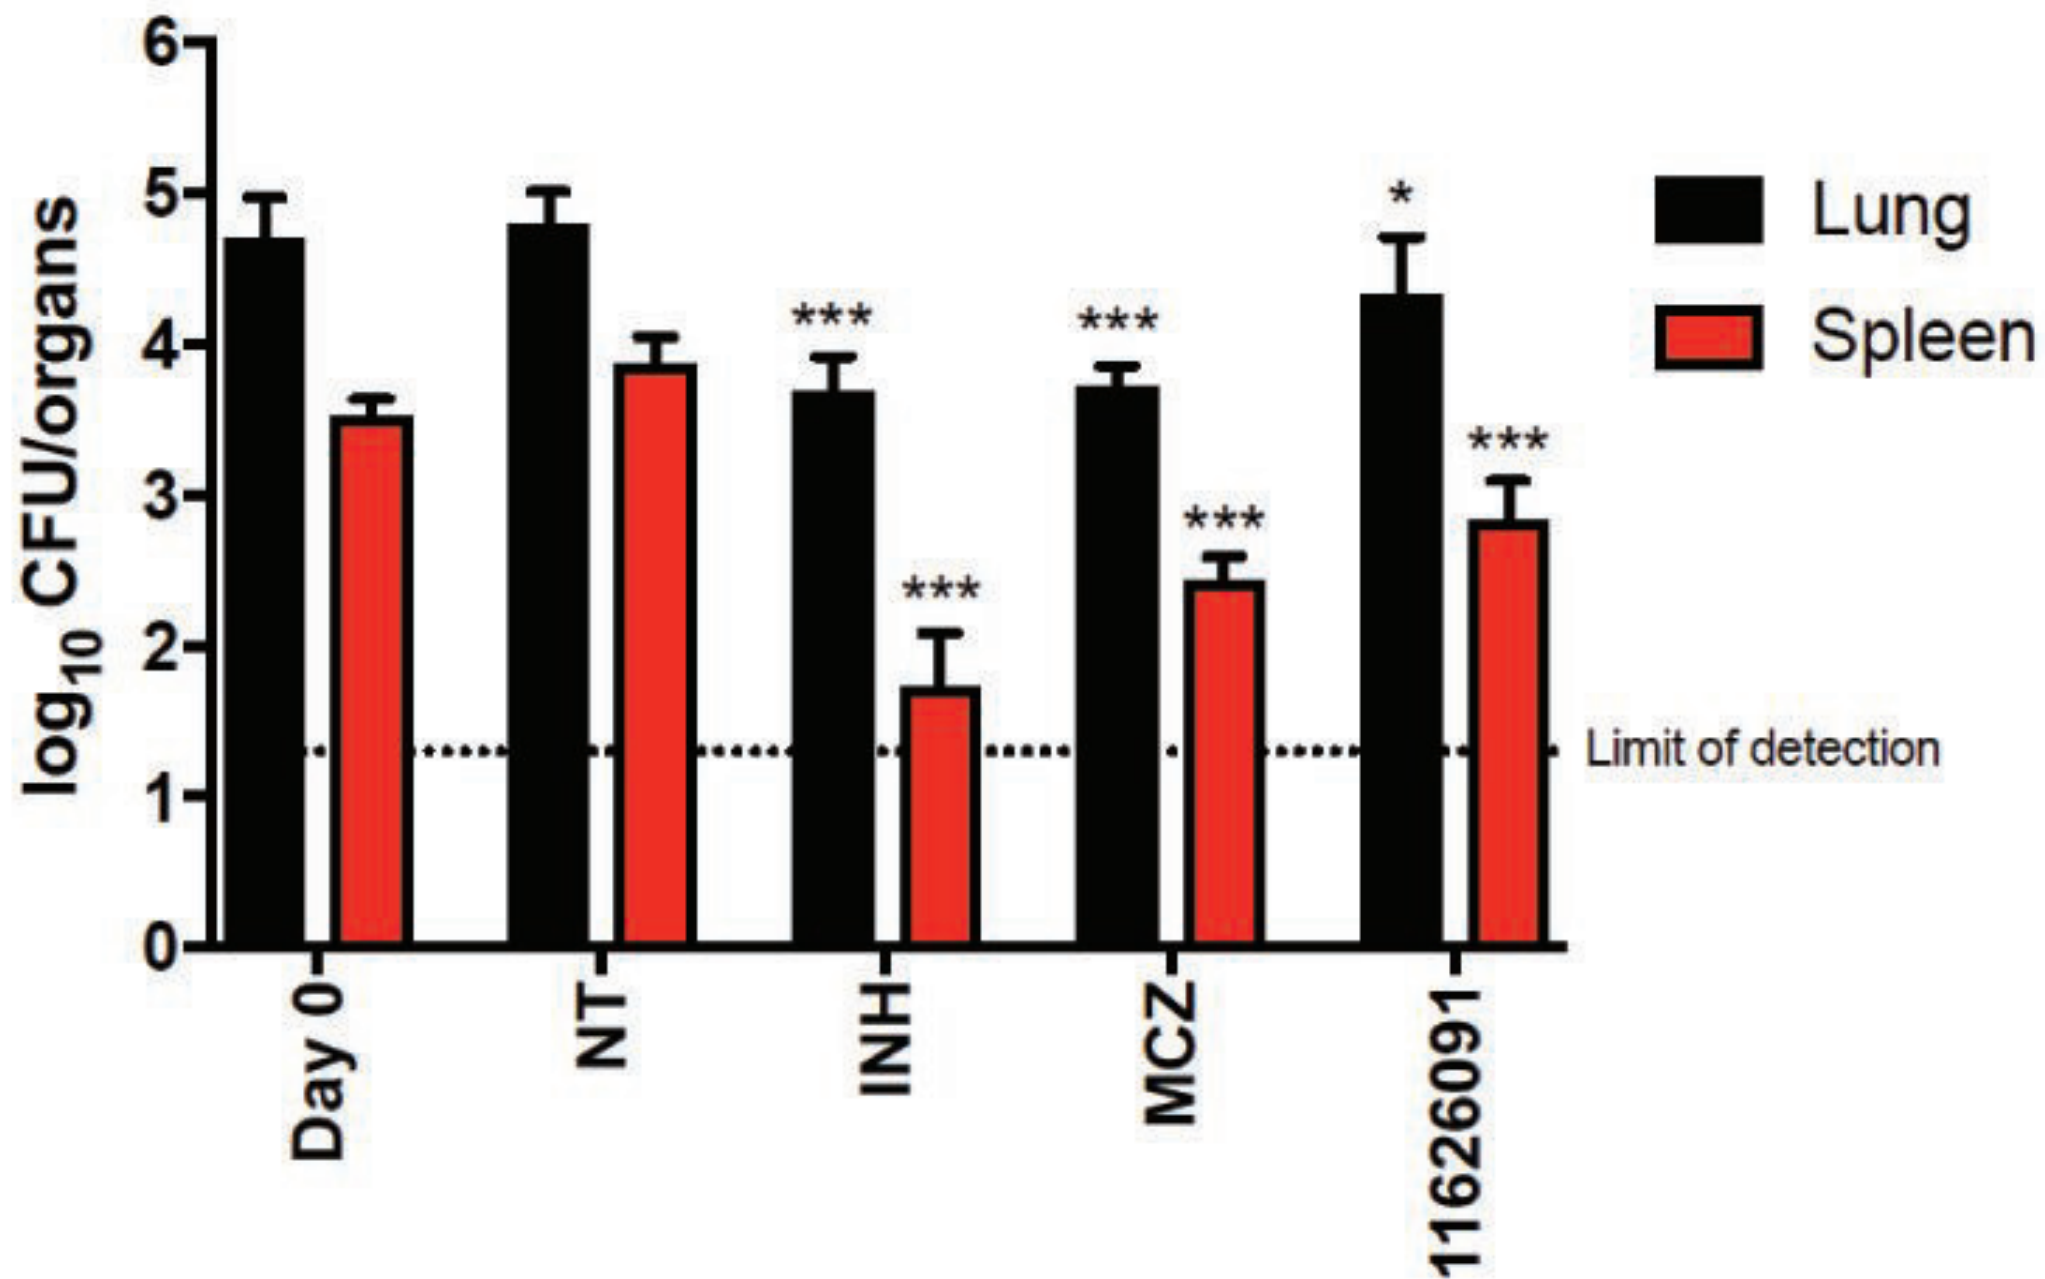

Source: http://biorxiv.org/content/10.1101/298539v1.full.pdf
